# Supplementary material for: Improving viable low cost generic medication prescription rate in primary care pediatric practice
Source: PubMed Central journal article supplement — BMJ Qual Improv Rep. 2015 Nov 24;4(1):u209517.w3931. doi: 10.1136/bmjquality.u209517.w3931 (PMC4693111; doi:10.1136/bmjquality.u209517.w3931), 2015-11-24
Supplement: bmjqir-4-u209517-w3931-s1.pdf [file bmjqir-4-u209517-w3931-s1.pdf]

**Table 1: Comparison of number of prescriptions before and after**

| <b>Name of Medication</b> | <b>Number of times prescribed in the first quarter (2012)</b> | <b>Number of times prescribed in the fourth quarter after PDSA-4 (2013-2014)</b> |
|---------------------------|---------------------------------------------------------------|----------------------------------------------------------------------------------|
| CONCERTA                  | 192                                                           | 21                                                                               |
| ADDERALL                  | 171                                                           | 23                                                                               |
| RITALIN                   | 98                                                            | 8                                                                                |
| VYVANSE                   | 36                                                            | 43                                                                               |
| INTUNIV                   | 27                                                            | 21                                                                               |
| FOCALIN                   | 26                                                            | 14                                                                               |
| TRI-VI-SOL                | 26                                                            | 23                                                                               |
| METADATE                  | 11                                                            | 6                                                                                |

**Table 2: Comparison among the overall health team and CHM-Pediatrics**

| Avg. overall Generic Rate                                                                         | 2010         | 2011        | 2012        | 2013         | 2014         |
|---------------------------------------------------------------------------------------------------|--------------|-------------|-------------|--------------|--------------|
| MSU Health Team (6 practices including Family Medicine, OB-GYN, Internal Medicine and Pediatrics) | 30.75 %      | 32%         | 33.9%       | 37.4%        | 39.5%        |
| <b>MSU-CHM Pediatrics alone</b>                                                                   | <b>21.25</b> | <b>20.5</b> | <b>22.5</b> | <b>52.3%</b> | <b>65.5%</b> |

# Run chart for rate of generic medication prescriptions

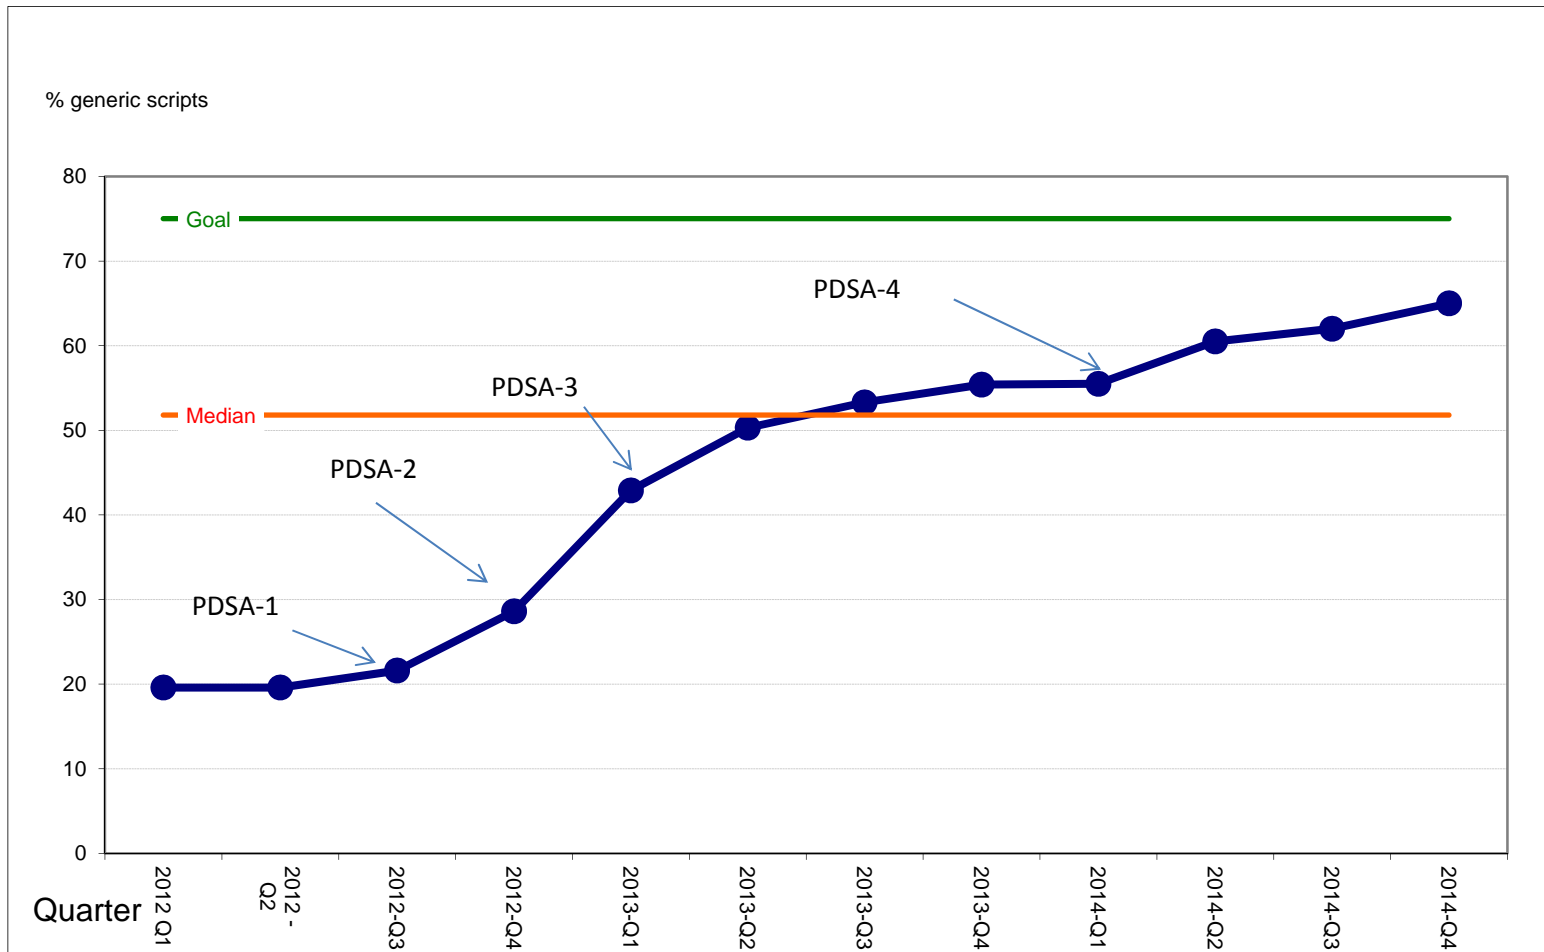

# Cost impact

|   | Brand name of drug | Mean generic cost across all doses for 30 day supply (\$) | Mean brand name cost across all doses (\$) | Savings impact (\$ saved x no. of prescription) over four quarters |
|---|--------------------|-----------------------------------------------------------|--------------------------------------------|--------------------------------------------------------------------|
| 1 | Concerta           | 76                                                        | 244                                        | 28 728                                                             |
| 2 | Ritalin            | 16                                                        | 66                                         | 4 500                                                              |
| 3 | Adderall           | 51                                                        | 190                                        | 20 572                                                             |
|   |                    |                                                           | Total Savings                              | \$53 800                                                           |

Source: Price from Good Rx and local pharmacies obtained by Sandra Campbell Pharm D., Pharmacy supervisor, Health team, MSU
